# Supplementary material for: Comparison of the natural course of clinical and radiologic features in 13 patients with TRPV4-related skeletal dysplasias
Source: Research Square preprint supplement (doi:10.21203/rs.3.rs-4843530/v1), 2024-08-23
Supplement: Supplementary file 1 [file bbbe0379450cf6ab4770435e.docx]

| **Clinical phenotype** | **Spondylometaphyseal dysplasia, Kozlowski type** | | | | | **Metatropic dysplasia** | | | **SEDM** | **Brachyolmia type 3** | | | **CDSMA** | |
| --- | --- | --- | --- | --- | --- | --- | --- | --- | --- | --- | --- | --- | --- | --- |
| **Patient number** | **1** | **2** | **3** | **4** | **5** | **6** | **7** | **8** | **9** | **10** | **11** | **12** | **13** |
| **Gender** | F | F | M | M | M | M | M | F | M | M | F | F | M |
| **Age at**  **Admission/**  **last visit** | 3 yr. 2 mo./  15yr | 6 yr 2 mo./  11 yr 6 mo. | 3 yr 1 mo./  8 yr 5 mo. | 44 yr. 5 mo | 3 yr 1 mo/  19yr. 9 mo. | 1 yr 11 mo/  10 yr 3mo. | 2 yr 3 mo/  5 yr 10 mo. | 13 mo/  5 yr. | 5 yr 3 mo/  15y | 12 yr 10 mo/  18 yr 6 mo. | 38yr | 14 yr 2 mo/  20 yr 9 mo | 1 yr/  8y 9 mo |
| **Height SDS at**  **Admission**  **last visit** | -1.63  -4.4 | -2.89  -4.83 | -2.08  -4.31 | -6.89 | -2.14  -6.36 | -1.5  -2.81 | -1.2  -2.37 | 0.77  -2.46 | 0.48  -1.72 | -1.40  -1.1 | -3.9 | -2.32  0.83 | -1.22  -2.1 |
| **Sitting height/**  **Height ratio** | 0.49*  0.42** | 0.47*  0.44** | 0.49*  0.45** | 0.40* | 0.48*  0,41** | 0.54*  0.52** | 0.53** | 0.53** | 0.52*  0.47** | 0.46** | 0.48* | 0.47** | NA |
| **Initial sign** | Waddling gait, PEV, scoliosis | Genu valgum | Genu valgum | NA | Genu valgum | Torticollis | Kyphosis | Kyphosis, tracheomalacia | Waddling gait,  limb pain | Waddling gait,  limb pain | NA | Kyphoscoliosis | Torticollis, laryngomalacia  PEV, hip dislocation |
| **Short trunk**  **Narrow-long trunk**  **Short neck** | +  -  + | +  -  + | +  -  + | +  -  + | +  -  + | -  +  - | -  +  - | -  +  + | -  +  - | +  -  - | +  -  - | +  -  - | -  -  + |
| **Short limbs**  **Brachydactyly type E** | -  - | -  - | -  - | -  - | -  - | +  + | +  + | +  + | -  + | -  - | -  - | -  - | -  - |
| **Prominent joints**  **Limited elbow joint**  **Hypermobile fingers**  **Swan-neck deformity** | -  +  +  + | -  +  +  + | -  +  +  - | -  +  +  + | -  +  +  + | +  +  +  - | +  +  +  - | +  +  +  - | +  +  +  - | -  +  -  - | -  +  -  - | -  +  -  - | -  -  -  - |
| **Skeletal features at the last visit** | Short-barrel chest, lumbar scoliosis, overriding toes | Barrel chest,  operated for coxa vara, genu varum | Barrel chest with mild scoliosis | Kypho-scoliosis with barrel chest | Kypho-scoliosis with barrel chest | Barrel chest, short trunk | Kyphosis with barrel chest, genu valgum | Kyphosis with barrel,  genu valgum | Mild scoliosis with  short trunk,  genu valgum | Severe scoliosis, operated coxa vara, genu varum | Scoliosis | Operated scoliosis | Kyphosis, operated for hip dysplasia and knee achillectomy |
| **Ambulation at the last visit** | Difficultly and painful running, long-distance walking and climbing stairs | Painful long-distance walking | Painful long-distance walking | Painful long-distance walking | Painful long-distance walking | Walking with a forward-leaning, painful long-distance walking and  climbing stairs | Waddling gait | Waddling gait | Normal ambulation | Painful long-distance walking | Large joint pain, normal ambulation | Normal ambulation | Normal ambulation |

**Abbreviations**: *CDSMA* congenital distal spinal muscular atrophy, *F* female, *M* male, *mo.* months, *NA* not available, *PEV* pes equinovarus, *SEDM* spondyloepiphyseal dysplasia Maroteaux type, *SDS* standard deviation score, *yr.* years, *: at the admission, **: at the last visit

**Table 1** Comparison of the clinical characteristics of the patients according to phenotype

**Table 2** Comparison of the radiological characteristics of the patients according to phenotype

| **Clinical phenotype** | **Spondylometaphyseal dysplasia, Kozlowski type** | | | | | **Metatropic dysplasia** | | | **SEDM** | **Brachyolmia type 3** | | | **CDSMA** |
| --- | --- | --- | --- | --- | --- | --- | --- | --- | --- | --- | --- | --- | --- |
| **Patient number** | **1** | **2** | **3** | **4** | **5** | **6** | **7** | **8** | **9** | **10** | **11** | **12** | **13** |
| **Vertebrae**  Platyspondyly  Anterior protrusion  Over-faced pedicles  Rectangular vertebrae  Scoliosis | Severe  +  +  -  + | Severe  +  +  -  - | Severe  +  +  -  + | Severe  +  +  -  + | Severe  +  +  -  + | Severe  +  +  -  + | Severe  +  +  -  - | Severe  +  +  -  - | Moderate  +  +  +  + | Mild  -  +  +  + | Mild  -  +  +  + | Mild  -  +  +  + | Mild  -  -  -  + |
| **Pelvis**  Flared iliac wings  Irregular/flat/slanted acetabulum  Halberd-shaped/ irregular proximal femoral metaphyses  Short femoral neck  Coxa vara | +  +/+/-  -/+  +  + | +  +/+/-  -/+  +  + | +  +/+/-  +/+  +  - | +  +/+/-  -/+  +  + | +  +/+/-  -/+  +  + | +  +/+/-  +/+  +  - | +  +/+/-  +/+  +  - | +  +/+/-  +/+  +  - | +  +/-/-  -/+  +  - | -  -/-/-  -/-  +  + | -  -/-/-  -/-  +  + | -  -/-/-  -/-  +  - | +  -/-/+  -/-  -  - |
| **Limbs**  Metaphyseal involvement  Epiphyseal involvement  Short long bones  Dumbbell-shaped long bones | Mild  -  -  - | Mild  -  -  - | Moderate  -  -  - | NA  NA  -  - | Mild  -  -  - | Severe  -  +  + | Severe  -  +  + | Severe  -  +  + | Mild  +  -  - | -  -  -  - | NA  NA  -  - | -  -  -  - | -  -  -  - |
| **Hands/feet**  Severe carpal ossification delay  Short phalanges  Short metacarpal/ metatarsals bones | +  -  -/+ | +  -  -/- | +  -  -/- | NA  -  -/+ | +  -  -/- | +  +  +/+ | +  +  +/+ | +  +  +/+ | -  +  +/+ | -  -  -/- | NA  -  -/- | -  -  -/- | -  -  -/- |

**Abbreviations**: *CDSMA* congenital distal spinal muscular atrophy, *NA* not available, *SEDM* spondyloepiphyseal dysplasia Maroteaux type
